# Supplementary material for: Phylogeny of Mycobacterium tuberculosis Beijing Strains Constructed from Polymorphisms in Genes Involved in DNA Replication, Recombination and Repair
Source: PLoS One. 2011 Jan 20;6(1):e16020. doi: 10.1371/journal.pone.0016020 (PMC3024326; doi:10.1371/journal.pone.0016020)
Supplement: Table S2 — Full list of 48 SNPs identified in this study. The first line indicates the gene and the second line indicates the position on that gene where polymorphisms were identified in relation to M. tuberculosis H37Rv strain (bottom). Polymorphisms that characterize and allowed discrimination of the 26 sequence types (Figure 2 and Table 1) are marked in red. (XLS) [file pone.0016020.s002.xls]

## Sheet: Feuil1
	Table S2. Full list of 48 SNPs identified in this study. The first line indicates the gene and the second line indicates the position on that gene where polymorphisms were identified in relation to M. tuberculosis H37Rv strain (bottom). Polymorphisms that characterize and allowed discrimination of the 26 sequence types (Figure 2 and Table 1) are marked in red.
		radA			recF		recX			rv2979	dnaQ				recR		recG	uvrC				ruvB	ligB		ligD				recD			tagA		uvrD1	dnaZX		nei	nth			alkA		ligC		mutT2	ogt		mutT4
		456	557	827	734	807	23	175	458	41	227	263	483	631	130	267	853	496	865	1164	1301	843	230	271	485	1030	1038	1738	360	416	831	537	385	1384	274	291	229	5	101	365	31	34	630	938	172	36	110	142	297
	Bmyc1	A	T	T	C	G	C	G	G	G	A	T	C	T	G	C	C	C	A	G	C	G	T	T	A	C	C	C	C	G	G	C	G	G	C	T	C	G	A	T	G	G	C	A	G	G	G	C	G
	Bmyc2	A	T	T	C	G	C	G	G	G	A	T	C	T	G	C	C	C	A	G	C	G	T	T	A	C	C	T	C	G	G	C	G	G	C	T	C	G	A	T	G	G	C	A	G	G	G	C	G
	Bmyc3	A	T	T	C	G	C	G	G	G	A	T	C	T	G	C	C	C	A	G	C	G	T	T	C	C	C	T	C	G	G	C	G	G	C	T	C	G	A	T	G	G	C	A	G	G	G	C	G
	Bmyc4	A	T	T	C	G	C	G	G	G	A	T	C	T	T	C	C	C	A	G	C	G	T	T	A	C	C	C	C	G	G	C	G	G	C	T	C	G	A	T	G	G	C	A	G	G	G	C	G
	Bmyc5	A	T	T	C	G	C	G	G	G	A	T	C	T	T	C	C	C	A	C	C	G	T	T	A	C	T	C	C	G	G	C	G	G	C	T	C	G	A	T	G	G	C	A	G	G	G	C	G
	Bmyc6	A	T	T	C	G	C	G	G	G	A	T	C	T	T	C	C	C	A	G	C	G	T	T	A	C	C	C	C	G	G	C	G	G	C	T	C	G	A	T	G	G	C	A	G	G	G	G	G
	Bmyc7	A	T	T	C	G	C	G	G	G	A	T	C	T	T	C	C	A	A	G	C	G	T	T	A	C	C	C	C	G	G	C	G	G	C	T	C	G	A	T	G	G	C	A	G	G	T	G	G
	Bmyc8	A	T	T	C	G	T	G	G	G	A	T	C	T	T	C	C	C	A	G	C	G	T	T	A	C	C	C	C	G	G	C	G	G	C	T	C	G	A	T	G	G	C	A	G	G	G	G	G
	Bmyc9	A	T	T	C	G	C	C	G	G	A	T	C	T	T	C	T	C	A	G	C	G	T	T	A	C	C	C	C	G	G	C	G	G	C	T	C	G	A	T	G	G	C	A	G	G	G	G	G
	Bmyc10	A	T	T	C	G	C	C	G	G	A	T	C	T	T	C	C	C	A	G	C	G	T	T	A	C	C	C	C	G	G	C	G	G	C	T	C	G	A	T	G	G	C	A	C	A	G	G	G
	Bmyc11	A	T	T	C	G	C	C	G	G	A	T	C	T	T	T	C	C	A	G	C	G	T	T	A	C	C	C	C	G	G	C	G	G	C	T	C	G	A	T	G	G	C	A	C	A	G	G	G
	Bmyc12	A	T	T	C	T	C	C	G	G	A	T	C	T	T	C	C	C	A	G	C	G	T	T	A	C	C	C	C	G	G	C	G	G	C	T	C	G	A	T	G	G	C	A	C	A	G	G	G
	Bmyc13	A	T	T	C	G	C	C	G	G	A	T	C	T	T	C	C	C	A	G	C	G	T	T	A	C	C	C	C	G	G	C	G	A	C	T	C	G	A	T	G	G	C	A	C	A	G	G	G
	Bmyc14	A	T	T	C	G	C	C	G	G	A	T	T	T	T	C	C	C	A	G	C	G	C	T	A	C	C	C	C	G	G	C	G	A	C	T	C	G	A	T	G	G	C	A	C	A	G	G	G
	Bmyc15	A	T	T	C	G	C	C	G	G	A	T	C	T	T	C	C	C	A	G	C	G	T	T	A	C	C	C	C	G	G	C	G	G	C	T	C	G	A	G	G	G	C	A	C	A	G	G	G
	Bmyc16	A	T	T	C	G	C	C	G	G	A	T	C	T	T	C	C	C	A	G	C	G	T	T	A	C	C	C	C	G	G	C	G	G	T	T	C	G	A	T	G	G	C	A	C	A	G	G	G
	Bmyc17	A	T	T	C	G	C	C	G	G	A	T	C	T	T	C	C	C	A	G	C	G	T	T	A	C	C	C	C	G	G	C	G	G	C	T	C	G	C	T	G	G	C	A	C	A	G	G	G
	Bmyc18	A	T	T	C	G	C	C	G	G	A	T	C	T	T	C	C	C	A	G	C	G	T	T	A	C	C	C	C	G	G	C	G	G	C	T	C	G	A	T	A	G	C	A	C	A	G	G	G
	Bmyc19	A	T	T	C	G	C	C	G	G	A	T	C	T	T	C	C	C	A	G	C	G	T	T	A	C	C	C	C	G	G	C	A	G	C	T	C	G	A	T	G	G	C	A	C	A	G	G	A
	Bmyc20	A	T	C	C	G	C	C	A	G	A	T	C	T	T	C	C	C	A	G	C	G	T	T	A	C	C	C	C	G	G	C	G	G	C	T	C	G	A	T	G	G	C	A	C	A	G	G	G
	Bmyc21	A	T	C	C	G	C	C	A	G	A	T	C	T	T	C	C	C	A	G	C	G	T	T	A	C	C	C	C	T	G	C	G	G	C	T	C	G	A	T	G	G	C	A	C	A	G	G	G
	Bmyc22	A	T	T	C	G	C	C	G	G	A	T	C	T	T	C	C	C	A	G	C	G	T	T	A	C	C	C	C	G	A	C	G	G	C	T	C	G	A	T	G	G	C	A	C	A	G	G	G
	Bmyc23	A	C	T	C	G	C	C	G	G	A	T	C	T	T	C	C	C	A	G	C	G	T	T	A	C	C	C	C	G	G	C	G	G	C	T	C	G	A	T	G	G	C	A	C	A	G	G	G
	Bmyc24	A	T	T	C	G	C	C	G	G	A	T	C	T	T	C	C	C	A	G	C	G	T	T	A	C	C	C	C	G	G	T	G	G	C	T	C	G	A	T	G	G	C	A	C	A	G	G	G
	Bmyc25	A	T	T	C	G	C	G	G	G	A	T	C	T	T	C	C	C	A	G	C	G	T	T	A	C	C	C	C	G	G	C	G	G	C	T	C	G	A	T	G	G	C	A	G	G	T	G	G
	Bmyc26	A	T	T	C	G	C	C	G	G	A	T	C	T	T	C	C	C	A	G	C	G	T	T	A	C	C	C	C	G	G	C	G	G	C	T	C	G	A	T	G	G	C	A	G	G	G	G	G
	Non-Beijing
	PBJ7	A	T	T	C	G	C	G	G	C	G	C	C	T	G	C	C	C	G	G	T	G	T	C	A	C	C	C	A	G	G	C	G	G	C	C	A	C	A	T	G	A	G	A	G	G	G	C	G
	H37Rv	G	T	T	T	G	C	G	G	C	G	T	C	G	G	C	C	C	G	G	T	A	T	C	A	T	C	C	A	G	G	C	G	G	C	C	A	C	A	T	G	A	G	G	G	G	G	C	G
